# Supplementary material for: AAV serotype 8-mediated liver specific GNMT expression delays progression of hepatocellular carcinoma and prevents carbon tetrachloride-induced liver damage
Source: PubMed Central journal article supplement (PMC6138656; doi:10.1038/s41598-018-30800-3), 2018-09-14

## Supplementary information

### **AAV serotype 8-mediated liver specific GNMT expression delays progression of hepatocellular carcinoma and prevents carbon tetrachloride-induced liver damage**

Cheng-Chieh Fang<sup>δ1</sup>, Ching-Fen Wu<sup>δ1</sup>, Yi-Jen Liao<sup>2</sup>, Shiu-Feng Huang<sup>3</sup>, Marcelo Chen<sup>4,5</sup>, Yi-Ming Arthur Chen<sup>\*1,6,7</sup>

<sup>1</sup>Center for Infectious Disease and Cancer Research (CICAR), Kaohsiung Medical University, Kaohsiung, Taiwan;

<sup>2</sup>National Mosquito-Borne Diseases Control Research Center, National Health Research Institutes, Miaoli, Taiwan;

<sup>3</sup>School of Medical Laboratory Science and Biotechnology, College of Medical Science and Technology, Taipei Medical University, Taipei, Taiwan;

<sup>4</sup>Institute of Molecular and Genomic Medicine, National Health Research Institutes, Miaoli, Taiwan;

<sup>5</sup>Department of Urology, Mackay Memorial Hospital Taipei, Taiwan;

<sup>6</sup>School of Medicine, Mackay Medical College, New Taipei City, Taiwan;

<sup>7</sup>Institute of Biomedical Sciences, National Sun Yat-sen University, Kaohsiung, Taiwan;

<sup>8</sup>Department of Microbiology and Immunology, Institute of Medical Research and Institute of Clinical Medicine, College of Medicine, Kaohsiung Medical University, Kaohsiung, Taiwan.

**\*Correspondence should be addressed to Yi-Ming Arthur Chen (E-mail: arthur@kmu.edu.tw), No. 100, Shih-Chuan 1st Rd, Kaohsiung City, Taiwan 80708. Phone: 886-7-3117820; Fax: 886-7-3212062**

δ: These authors contributed equally to this work.

**Figure S1. Original WB image for Fig. 1c**

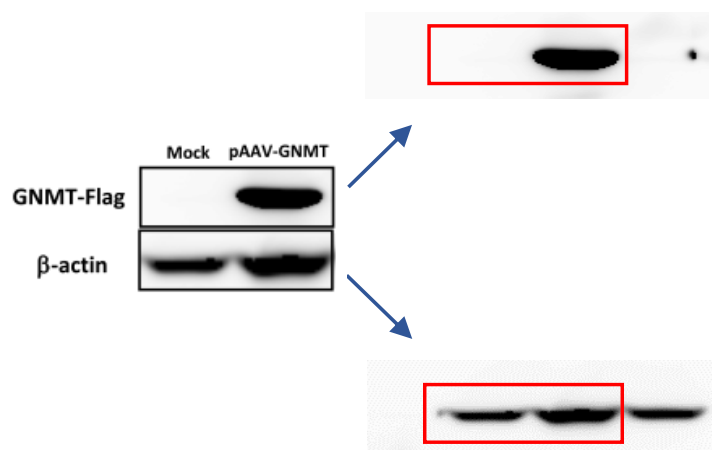

Supplement: 41598_2018_30800_MOESM1_ESM.pdf [file 41598_2018_30800_MOESM1_ESM.pdf]
